# Supplementary material
Source: MDPI journal article supplement (https://www.mdpi.com/2076-3417/11/12/5755)
Supplement: s1 [file s1]

Supplementary Material

# A Pilot Proteomic Study of Normal Human Tears: Leptin as a Potential Biomarker of Metabolic Disorders

Mungunshur Byambajav <sup>1,\*†</sup>, Cristina Arroyo-del Arroyo <sup>2†</sup>, Amalia Enríquez-de-Salamanca <sup>2,3</sup>,  
Itziar Fernández <sup>3</sup>, Eilidh Martin <sup>1</sup> and Suzanne Hagan <sup>1</sup>

<sup>1</sup> Department of Vision Sciences, School of Health and Life Sciences, Glasgow Caledonian University, Glasgow, G4 0BA, UK; eilidh.martin@gcu.ac.uk (E.M.); suzanne.hagan@gcu.ac.uk (S.H.)

<sup>2</sup> IOBA (Institute of Applied Ophthalmobiology), University of Valladolid, 47011 Valladolid, Spain; carroyoa@ioba.med.uva.es (C.A.A.); amalia@ioba.med.uva.es (A.E.-S.)

<sup>3</sup> CIBER-BBN (Biomedical Research Networking Center in Bioengineering Biomaterials and Nanomedicine), 28029 Madrid, Spain; itziar.fernandez@ioba.med.uva.es

\* Correspondence: mungunshur.byambajav@gcu.ac.uk; Tel.: +44-0141-331-3672

† Both authors have contributed equally

**Table S1.** Final concentrations of the metabolic proteins.

| N  | Leptin (pg/ml)<br>Standard range<br>137-100.000 |        | Insulin (pg/ml)<br>Standard range<br>137-100.000 |        | Active Ghrelin<br>(pg/ml)<br>Standard range<br>13.7-10.000 |        | C-peptide (pg/ml)<br>Standard range<br>27.4-20.000 |       | GIP (pg/ml)<br>Standard range<br>1.4-1.000 |      |
|----|-------------------------------------------------|--------|--------------------------------------------------|--------|------------------------------------------------------------|--------|----------------------------------------------------|-------|--------------------------------------------|------|
|    | V1                                              | V2     | V1                                               | V2     | V1                                                         | V2     | V1                                                 | V2    | V1                                         | V2   |
| 1  | *374.5                                          | *374.5 | 1354.8                                           | 1354.8 | 133.9                                                      | *32.3  | 240.1                                              | *56.1 | *0.4                                       | OOR  |
| 2  | *381.1                                          | *374.5 | 2028.3                                           | 1422.1 | 140.3                                                      | 130.1  | 232.7                                              | 236.4 | *2.3                                       | OOR  |
| 3  | *367.8                                          | *374.5 | 1556.8                                           | 1287.5 | 132.7                                                      | 132.7  | 247.6                                              | 236.4 | *2.3                                       | OOR  |
| 4  | *381.1                                          | *381.1 | 581.8                                            | 1422.1 | 132.7                                                      | 135.2  | 247.6                                              | 247.6 | *0.8                                       | *1.1 |
| 5  | *387.8                                          | *394.4 | 1422.1                                           | 1624.1 | 130.1                                                      | 135.2  | 247.6                                              | 240.2 | OOR                                        | *0.8 |
| 6  | *407.8                                          | *397.8 | 2028.3                                           | 2356.4 | 135.2                                                      | 135.2  | 247.6                                              | 247.6 | *4.2                                       | *5.3 |
| 7  | *367.8                                          | *374.5 | 1422.1                                           | 1210.1 | 135.2                                                      | 132.7  | 236.4                                              | 243.9 | *0.8                                       | *1.1 |
| 8  | *367.8                                          | *374.5 | 1422.1                                           | 581.8  | 130.1                                                      | 135.2  | 247.6                                              | 245.8 | *0.8                                       | OOR  |
| 9  | *374.5                                          | *374.5 | 1152.8                                           | 1018.2 | 132.7                                                      | *26.0  | 243.9                                              | 110.1 | OOR                                        | OOR  |
| 10 | *374.5                                          | *381.1 | 1152.8                                           | 1287.5 | *18.8                                                      | *26.0  | 56.1                                               | 73.5  | OOR                                        | OOR  |
| 11 | *381.1                                          | *374.5 | 1354.8                                           | 1624.1 | 132.7                                                      | 132.7  | 247.6                                              | 240.2 | *0.8                                       | *2.3 |
| 12 | *367.8                                          | *381.1 | 581.8                                            | 1287.5 | *127.6                                                     | 125.1  | 242.0                                              | 221.4 | OOR                                        | OOR  |
| 13 | *387.8                                          | *387.8 | 3187.7                                           | 1556.8 | 140.3                                                      | 135.2  | 258.9                                              | 247.6 | *4.8                                       | *1.9 |
| 14 | *374.5                                          | *381.1 | 1210.1                                           | 1287.5 | 135.2                                                      | 130.1  | 242.0                                              | 236.4 | *2.7                                       | *0.8 |
| 15 | *367.8                                          | *384.5 | 1152.8                                           | 1656.3 | 135.2                                                      | 130.1  | 243.9                                              | 247.6 | *0.8                                       | *3.1 |
| 16 | *394.4                                          | *394.4 | 2028.3                                           | 581.8  | 141.6                                                      | 132.7  | 255.1                                              | 243.9 | *4.2                                       | *0.6 |
| 17 | *387.8                                          | *381.1 | 1287.5                                           | 1152.8 | *120.0                                                     | *122.5 | 228.9                                              | 228.9 | OOR                                        | OOR  |

**Key words:** V1, the second visit; V2, the third visit; OOR, Out of Range

\* - indicates values which were detected as extrapolated beyond the standard range. Final concentrations include dilution factor (x10).
